# Supplementary material
Source: PubMed Central journal article supplement (PMC6136843)
Supplement: NIHMS944031-supplement-supplement_1.pdf [file NIHMS944031-supplement-supplement_1.pdf]

On Line Supplemental Tables

Appendix Figure 1: Feeling Tone Questionnaire (FTQ), 16 item set:

Scree plot from the exploratory factor analysis of the total sample (n = 6756)

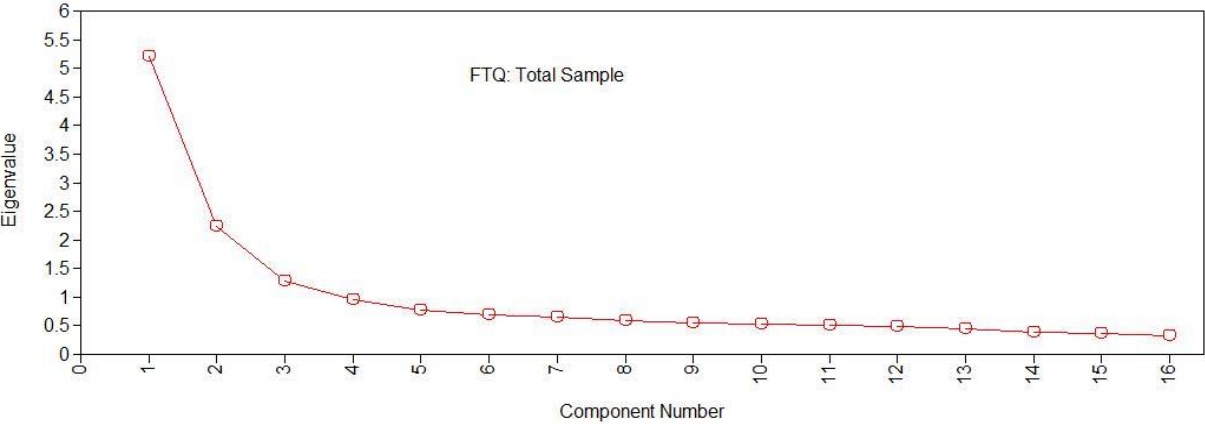

Appendix Table 1. Feeling Tone Questionnaire (FTQ): Model fit statistics

| CFA Models                                                                                                                                                                                            | RMSEA | CFI   |
|-------------------------------------------------------------------------------------------------------------------------------------------------------------------------------------------------------|-------|-------|
| <b>Unidimensional Models</b>                                                                                                                                                                          |       |       |
| 16 Item Set (Model 1a in Table 3)                                                                                                                                                                     | 0.105 | 0.829 |
| 13 Item Set (Model 1b in Table 3)                                                                                                                                                                     | 0.084 | 0.925 |
| Positive Affect Item Set (Model 1c in Table 3)                                                                                                                                                        | 0.081 | 0.967 |
| Negative Affect Item Set (Model 1d in Table 3)                                                                                                                                                        | 0.088 | 0.876 |
| 16 Item Set with Correlated Item Uniqueness Among Positive Affect Items                                                                                                                               | 0.067 | 0.954 |
| 16 Item Set with Correlated Item Uniqueness Among Negative Affect Items (Model 2a in Table 3)                                                                                                         | 0.070 | 0.940 |
| 16 Item Set with Correlated Item Uniqueness Among Positive and Negative Affect Items (Model 2b in Table 3)<br>Note: Uniqueness correlation between items happy and nice day yesterday was set to zero | 0.061 | 0.973 |
| 13 Item Set with Correlated Item Uniqueness Among Negative Affect Items                                                                                                                               | 0.062 | 0.963 |
| 13 Item Set with Correlated Item Uniqueness Among Positive and Negative Affect Items<br>Note: Uniqueness correlation between items people are helpful here and sleep well was set to zero             | 0.039 | 0.994 |
| 16 Item Set with Correlated Residuals (for items health with pain and stops; bored with lonely)                                                                                                       | 0.086 | 0.888 |
| 13 Item Set with Correlated Residuals (for items bored with lonely)                                                                                                                                   | 0.071 | 0.947 |
| <b>Methods Factor (Bifactor) Models – 16 Item set</b>                                                                                                                                                 |       |       |
| Positive Affect Items as Methods Factor                                                                                                                                                               | 0.067 | 0.937 |
| Negative Affect Items as Methods Factor (Model 3 in Table 3)                                                                                                                                          | 0.072 | 0.926 |
| <b>Modified Traditional BiFactor Models (orthogonal factors)</b>                                                                                                                                      |       |       |
| 16 Item Three Group Model                                                                                                                                                                             | 0.058 | 0.956 |
| 16 Item Two Group Model (Model 4 in Table 3)                                                                                                                                                          | 0.062 | 0.950 |
| 13 Item Three Group Model                                                                                                                                                                             | 0.046 | 0.982 |
| <b>Two Factor CFA, Positive and Negative Affect Items, Orthogonal</b>                                                                                                                                 |       |       |
| Two Factor CFA, Positive and Negative Affect Items with Oblique (Geomin) Rotation (Model 5 in Table 3)                                                                                                | 0.072 | 0.920 |
| Three Factor CFA, Positive, Negative Affect and Health Related Items with Oblique (Geomin) Rotation                                                                                                   | 0.066 | 0.934 |
| <b>Unidimensional Models of 16 Item Sets by Demographic Subgroups</b>                                                                                                                                 |       |       |
| Non-Hispanic White                                                                                                                                                                                    | 0.097 | 0.848 |
| Non-Hispanic Black                                                                                                                                                                                    | 0.118 | 0.799 |
| Hispanic                                                                                                                                                                                              | 0.148 | 0.677 |
| <b>Unidimensional Models of 13 Item Set by Demographic Subgroups</b>                                                                                                                                  |       |       |

| CFA Models                                                                   | RMSEA | CFI   |
|------------------------------------------------------------------------------|-------|-------|
| Non-Hispanic White                                                           | 0.081 | 0.928 |
| Non-Hispanic Black                                                           | 0.089 | 0.923 |
| Hispanic                                                                     | 0.106 | 0.882 |
| Unidimensional Models of 9 Positive Affect Item Set by Demographic Subgroups |       |       |
| Non-Hispanic White                                                           | 0.078 | 0.968 |
| Non-Hispanic Black                                                           | 0.100 | 0.954 |
| Hispanic                                                                     | 0.110 | 0.939 |
| Unidimensional Models of 7 Negative Affect Item Set by Demographic Subgroups |       |       |
| Non-Hispanic White                                                           | 0.087 | 0.875 |
| Non-Hispanic Black                                                           | 0.087 | 0.876 |
| Hispanic                                                                     | 0.111 | 0.892 |

Appendix Table 2. Feeling Tone Questionnaire (FTQ): Discrimination 'a' parameter estimates: IRTPRO individual subgroup runs

| Item name                                                        | 13 item set |      |      |       | 9 positive affect item set |      |      |       |
|------------------------------------------------------------------|-------------|------|------|-------|----------------------------|------|------|-------|
|                                                                  | Total       | NHW  | NHB  | Hisp. | Total                      | NHW  | NHB  | Hisp. |
| Are you feeling well?                                            | 1.50        | 1.54 | 1.43 | 1.19  | 1.49                       | 1.53 | 1.41 | 1.18  |
| Do you like being here?                                          | 1.50        | 1.52 | 1.47 | 1.27  | 1.43                       | 1.45 | 1.41 | 1.25  |
| Are you feeling happy today?                                     | 1.84        | 1.84 | 1.73 | 2.20  | 1.75                       | 1.75 | 1.65 | 2.13  |
| Do you have any pain?                                            |             |      |      |       |                            |      |      |       |
| Are you feeling bored?                                           | 0.68        | 0.73 | 0.57 | 0.59  |                            |      |      |       |
| Are people helpful here?                                         | 1.91        | 1.91 | 1.95 | 1.37  | 1.93                       | 1.93 | 1.96 | 1.38  |
| Do you feel lonely?                                              | 0.50        | 0.56 | 0.36 | 0.34  |                            |      |      |       |
| Is there anything that stops you from doing what you want to do? |             |      |      |       |                            |      |      |       |
| Do you have a good appetite?                                     | 1.63        | 1.60 | 1.60 | 1.97  | 1.67                       | 1.63 | 1.62 | 1.99  |
| Do you like the people here?                                     | 1.99        | 1.89 | 2.21 | 1.96  | 2.04                       | 1.93 | 2.27 | 2.05  |
| Is anybody nasty to you?                                         | 0.74        | 0.74 | 0.73 | 0.88  |                            |      |      |       |
| Do you sleep well?                                               | 1.37        | 1.28 | 1.48 | 2.06  | 1.34                       | 1.26 | 1.47 | 1.99  |
| Did you have a nice day yesterday?                               | 2.30        | 2.22 | 2.43 | 2.61  | 2.26                       | 2.18 | 2.41 | 2.55  |
| Did anything upset you yesterday?                                | 0.79        | 0.88 | 0.58 | 0.79  |                            |      |      |       |
| Do you have any trouble with your health?                        |             |      |      |       |                            |      |      |       |
| Do you feel good about tomorrow?                                 | 1.43        | 1.42 | 1.56 | 1.23  | 1.43                       | 1.42 | 1.58 | 1.21  |

Appendix Table 3. Feeling Tone Questionnaire (FTQ) 13 item set: IRT item parameters and DIF statistics for the race/ethnicity groups, non-Hispanic White is the reference group

| Item name                                                        | Group              | <i>a</i>       | <i>b1</i>       | <i>b2</i>       | <i>a</i> DIF*       | <i>b</i> DIF*           |
|------------------------------------------------------------------|--------------------|----------------|-----------------|-----------------|---------------------|-------------------------|
| Are you feeling well?                                            | Non-Hispanic White | 1.54<br>(0.05) | -1.45<br>(0.04) | -0.18<br>(0.03) |                     |                         |
|                                                                  | Non-Hispanic Black | 1.47<br>(0.12) | -1.50<br>(0.09) | 0.11<br>(0.07)  | 0.1 (0.757)         | <b>29.2 (&lt;0.001)</b> |
|                                                                  | Hispanic           | 1.37<br>(0.17) | -1.58<br>(0.14) | 0.26<br>(0.12)  | 0.3 (0.574)         | <b>28.1 (&lt;0.001)</b> |
| Do you like being here?                                          | Non-Hispanic White | 1.51<br>(0.05) | -1.33<br>(0.04) | -0.13<br>(0.03) | DIF not significant |                         |
|                                                                  | Non-Hispanic Black |                |                 |                 |                     |                         |
|                                                                  | Hispanic           |                |                 |                 |                     |                         |
| Are you feeling happy?                                           | Non-Hispanic White | 1.84<br>(0.06) | -1.19<br>(0.03) | -0.06<br>(0.02) |                     |                         |
|                                                                  | Non-Hispanic Black | 1.78<br>(0.14) | -1.37<br>(0.08) | -0.04<br>(0.06) | 0.1 (0.806)         | 7.0 (0.030)             |
|                                                                  | Hispanic           | 2.52<br>(0.30) | -1.33<br>(0.09) | -0.20<br>(0.08) | 0.8 (0.379)         | <b>16.4 (&lt;0.001)</b> |
| Do you have any pain?                                            | Item excluded      |                |                 |                 |                     |                         |
| Are you feeling bored today?                                     | Non-Hispanic White | 0.73<br>(0.04) | -2.31<br>(0.12) | -1.20<br>(0.07) |                     |                         |
|                                                                  | Non-Hispanic Black | 0.58<br>(0.09) | -3.36<br>(0.46) | -1.83<br>(0.25) | 1.5 (0.216)         | 8.7 (0.013)             |
|                                                                  | Hispanic           | 0.67<br>(0.14) | -2.79<br>(0.49) | -1.25<br>(0.21) | 0.1 (0.763)         | 4.9 (0.084)             |
| Are people helpful here?                                         | Non-Hispanic White | 1.91<br>(0.07) | -1.96<br>(0.05) | -0.41<br>(0.02) |                     |                         |
|                                                                  | Non-Hispanic Black | 2.00<br>(0.16) | -1.91<br>(0.11) | -0.13<br>(0.06) | 0.3 (0.599)         | <b>28.0 (&lt;0.001)</b> |
|                                                                  | Hispanic           | 1.57<br>(0.20) | -2.04<br>(0.19) | -0.23<br>(0.09) | 0.8 (0.372)         | 8.0 (0.019)             |
| Do you feel lonely?                                              | Non-Hispanic White | 0.56<br>(0.03) | -2.17<br>(0.13) | -0.42<br>(0.06) |                     |                         |
|                                                                  | Non-Hispanic Black | 0.38<br>(0.07) | -3.93<br>(0.73) | -1.59<br>(0.31) | 4.1 (0.044)         | <b>25.6 (&lt;0.001)</b> |
|                                                                  | Hispanic           | 0.39<br>(0.11) | -3.39<br>(0.89) | -0.54<br>(0.24) | 1.0 (0.312)         | 2.6 (0.280)             |
| Is there anything that stops you from doing what you want to do? | Item excluded      |                |                 |                 |                     |                         |
| Do you have a good appetite?                                     | Non-Hispanic White | 1.59<br>(0.05) | -1.65<br>(0.05) | -0.28<br>(0.03) |                     |                         |
|                                                                  | Non-Hispanic Black | 1.65<br>(0.13) | -1.66<br>(0.10) | 0.13<br>(0.07)  | 0.2 (0.689)         | <b>57.7 (&lt;0.001)</b> |
|                                                                  | Hispanic           | 2.26<br>(0.28) | -1.52<br>(0.11) | -0.09<br>(0.08) | 0.9 (0.357)         | <b>22.6 (&lt;0.001)</b> |
| Do you like the people here?                                     | Non-Hispanic White | 1.89<br>(0.07) | -2.37<br>(0.07) | -0.44<br>(0.02) |                     |                         |
|                                                                  | Non-Hispanic Black | 2.28<br>(0.19) | -2.18<br>(0.12) | -0.20<br>(0.05) | 2.8 (0.096)         | <b>19.4 (&lt;0.001)</b> |
|                                                                  | Hispanic           | 2.24<br>(0.27) | -1.94<br>(0.15) | -0.36<br>(0.07) | 0.2 (0.649)         | 0.3 (0.870)             |

| Item name                                 | Group              | <i>a</i>       | <i>b1</i>       | <i>b2</i>       | <i>a</i> DIF*   | <i>b</i> DIF*           |
|-------------------------------------------|--------------------|----------------|-----------------|-----------------|-----------------|-------------------------|
| Is anybody nasty to you?                  | Non-Hispanic White | 0.75<br>(0.04) | -3.14<br>(0.16) | -2.04<br>(0.10) | NS, Anchor item |                         |
|                                           | Non-Hispanic Black |                |                 |                 |                 |                         |
|                                           | Hispanic           |                |                 |                 |                 |                         |
| Do you sleep well?                        | Non-Hispanic White | 1.28<br>(0.05) | -1.52<br>(0.05) | -0.08<br>(0.03) |                 |                         |
|                                           | Non-Hispanic Black | 1.52<br>(0.12) | -1.72<br>(0.10) | 0.15<br>(0.07)  | 2.4 (0.121)     | <b>61.6 (&lt;0.001)</b> |
|                                           | Hispanic           | 2.36<br>(0.28) | -1.36<br>(0.10) | -0.04<br>(0.09) | 2.2 (0.142)     | <b>35.0 (&lt;0.001)</b> |
| Did you have a nice day yesterday?        | Non-Hispanic White | 2.22<br>(0.07) | -1.63<br>(0.04) | -0.28<br>(0.02) |                 |                         |
|                                           | Non-Hispanic Black | 2.48<br>(0.20) | -1.66<br>(0.08) | -0.08<br>(0.06) | 1.2 (0.271)     | <b>28.6 (&lt;0.001)</b> |
|                                           | Hispanic           | 2.99<br>(0.38) | -1.58<br>(0.11) | -0.24<br>(0.07) | 0.7 (0.416)     | 10.9 (0.004)            |
| Did anything upset you yesterday?         | Non-Hispanic White | 0.88<br>(0.05) | -2.87<br>(0.15) | -1.87<br>(0.09) |                 |                         |
|                                           | Non-Hispanic Black | 0.59<br>(0.11) | -4.79<br>(0.83) | -3.23<br>(0.54) | 3.7 (0.054)     | <b>12.3 (0.002)</b>     |
|                                           | Hispanic           | 0.88<br>(0.21) | -3.40<br>(0.65) | -2.39<br>(0.42) | <0.1 (0.970)    | 10.0 (0.007)            |
| Do you have any trouble with your health? | Item excluded      |                |                 |                 |                 |                         |
| Do you feel good about tomorrow?          | Non-Hispanic White | 1.45<br>(0.04) | -2.03<br>(0.05) | -0.09<br>(0.03) | NS, Anchor item |                         |
|                                           | Non-Hispanic Black |                |                 |                 |                 |                         |
|                                           | Hispanic           |                |                 |                 |                 |                         |

\* Statistical test for differences in parameters is Wald test using 1 d.f. for the test of differences in the *a* parameters for the comparison groups and 2 d.f. for the test of differences in the *b* parameters.

\* Bolded entries indicate items that evidence DIF after correction for multiple comparisons; “NS, Anchor item” refers to a non-significant DIF finding for the item during the initial iterative anchor item selection process. The “non-significant” designation refers to the second stage DIF detection procedure using the anchor items and testing the remaining items. The “non-significant” designation indicates that the item was not found to have DIF in the second stage of DIF detection.

Appendix Table 4. Feeling Tone Questionnaire (FTQ) positive items set: IRT item parameters and DIF statistics for the race/ethnicity groups, non-Hispanic White is the reference group

| Item name                          | Group              | <i>a</i>       | <i>b1</i>       | <i>b2</i>       | <i>a</i> DIF*           | <i>b</i> DIF*           |
|------------------------------------|--------------------|----------------|-----------------|-----------------|-------------------------|-------------------------|
| Are you feeling well?              | Non-Hispanic White | 1.53<br>(0.05) | -1.47<br>(0.04) | -0.19<br>(0.03) |                         |                         |
|                                    | Non-Hispanic Black | 1.42<br>(0.12) | -1.60<br>(0.12) | 0.05<br>(0.07)  | 0.6 (0.429)             | <b>18.8 (&lt;0.001)</b> |
|                                    | Hispanic           | 1.37<br>(0.18) | -1.58<br>(0.17) | 0.25<br>(0.13)  | 0.7 (0.402)             | <b>22.2 (&lt;0.001)</b> |
| Do you like being here?            | Non-Hispanic White |                |                 |                 | NS, Anchor item         |                         |
|                                    | Non-Hispanic Black | 1.44<br>(0.05) | -1.39<br>(0.04) | -0.14<br>(0.03) |                         |                         |
|                                    | Hispanic           |                |                 |                 |                         |                         |
| Are you feeling happy?             | Non-Hispanic White | 1.75<br>(0.06) | -1.23<br>(0.04) | -0.06<br>(0.02) |                         |                         |
|                                    | Non-Hispanic Black | 1.67<br>(0.14) | -1.49<br>(0.10) | -0.09<br>(0.07) | 0.3 (0.606)             | <b>11.3 (0.004)</b>     |
|                                    | Hispanic           | 2.47<br>(0.31) | -1.34<br>(0.12) | -0.19<br>(0.09) | 5.2 (0.023)             | <b>12.2 (0.002)</b>     |
| Are people helpful here?           | Non-Hispanic White | 1.93<br>(0.07) | -1.96<br>(0.05) | -0.41<br>(0.02) |                         |                         |
|                                    | Non-Hispanic Black | 1.98<br>(0.17) | -2.00<br>(0.13) | -0.19<br>(0.06) | 0.1 (0.797)             | <b>17.8 (&lt;0.001)</b> |
|                                    | Hispanic           | 1.60<br>(0.21) | -2.02<br>(0.21) | -0.24<br>(0.09) | 2.2 (0.139)             | 3.9 (0.144)             |
| Do you have a good appetite?       | Non-Hispanic White | 1.63<br>(0.06) | -1.64<br>(0.05) | -0.28<br>(0.03) |                         |                         |
|                                    | Non-Hispanic Black | 1.63<br>(0.14) | -1.74<br>(0.12) | 0.08<br>(0.07)  | <0.1 (0.999)            | <b>43.1 (&lt;0.001)</b> |
|                                    | Hispanic           | 2.31<br>(0.29) | -1.50<br>(0.13) | -0.09<br>(0.09) | 5.0 (0.025)             | <b>18.2 (&lt;0.001)</b> |
| Do you like the people here?       | Non-Hispanic White | 1.93<br>(0.07) | -2.36<br>(0.07) | -0.44<br>(0.02) |                         |                         |
|                                    | Non-Hispanic Black | 2.29<br>(0.20) | -2.26<br>(0.15) | -0.26<br>(0.06) | 2.8 (0.096)             | <b>13.7 (0.001)</b>     |
|                                    | Hispanic           | 2.38<br>(0.30) | -1.89<br>(0.17) | -0.36<br>(0.08) | 2.0 (0.157)             | 2.8 (0.247)             |
| Do you sleep well?                 | Non-Hispanic White | 1.26<br>(0.05) | -1.54<br>(0.05) | -0.09<br>(0.03) |                         |                         |
|                                    | Non-Hispanic Black | 1.48<br>(0.13) | -1.82<br>(0.13) | 0.09<br>(0.08)  | 2.6 (0.106)             | <b>59.6 (&lt;0.001)</b> |
|                                    | Hispanic           | 2.31<br>(0.29) | -1.37<br>(0.12) | -0.03<br>(0.09) | <b>12.6 (&lt;0.001)</b> | <b>24.0 (&lt;0.001)</b> |
| Did you have a nice day yesterday? | Non-Hispanic White | 2.18<br>(0.08) | -1.66<br>(0.04) | -0.28<br>(0.02) |                         |                         |
|                                    | Non-Hispanic Black | 2.43<br>(0.21) | -1.76<br>(0.11) | -0.14<br>(0.06) | 1.2 (0.268)             | <b>22.5 (&lt;0.001)</b> |



| Item name                        | Group              | <i>a</i>       | <i>b1</i>       | <i>b2</i>       | <i>a</i> DIF* | <i>b</i> DIF*       |
|----------------------------------|--------------------|----------------|-----------------|-----------------|---------------|---------------------|
|                                  | Hispanic           | 2.97<br>(0.39) | -1.58<br>(0.13) | -0.23<br>(0.08) | 3.9 (0.047)   | 7.4 (0.025)         |
| Do you feel good about tomorrow? | Non-Hispanic White | 1.42<br>(0.05) | -2.02<br>(0.06) | -0.10<br>(0.03) |               |                     |
|                                  | Non-Hispanic Black | 1.60<br>(0.14) | -2.20<br>(0.16) | -0.12<br>(0.07) | 1.3 (0.247)   | <b>13.7 (0.001)</b> |
|                                  | Hispanic           | 1.41<br>(0.19) | -1.98<br>(0.21) | -0.04<br>(0.11) | <0.1 (0.939)  | 0.3 (0.843)         |

\* Statistical test for differences in parameters is Wald test using 1 d.f. for the test of differences in the *a* parameters for the comparison groups and 2 d.f. for the test of differences in the *b* parameters.

\* Bolded entries indicate items that evidence DIF after correction for multiple comparisons; “NS, Anchor item” refers to a non-significant DIF finding for the item during the initial iterative anchor item selection process. The “non-significant” designation refers to the second stage DIF detection procedure using the anchor items and testing the remaining items. The “non-significant” designation indicates that the item was not found to have DIF in the second stage of DIF detection.
